# Supplementary material for: How Public Health Professionals View Mandatory Vaccination in Italy—A Cross-Sectional Survey
Source: MDPI journal article supplement (doi:10.3390/vaccines9060580), 2021-06-01
Supplement: s1 [file s1]

Table S1 Dependent variables dichotomization for univariate and multivariate analysis

a. Attitudes towards mandatory vaccination (total 1044)

|                                      | N (%)      |            |
|--------------------------------------|------------|------------|
|                                      | Yes        | No         |
| In favour of the 2017 Italian MV law | 951 (91.1) | 93 (8.9)   |
| The 2017 MV law should be repealed   | 228 (21.8) | 816 (78.2) |
| In favour of “flexible” MV           | 107 (10.2) | 937 (89.8) |

MV, mandatory vaccination

b. Perception of the impact of mandatory vaccination (total 971)

|                                                               | N (%)      |            |
|---------------------------------------------------------------|------------|------------|
|                                                               | Yes        | No         |
| Optimistic regarding the epidemiological impact of MV         | 875 (90.1) | 96 (9.8)   |
| Optimistic regarding the social impact of MV                  | 141 (14.5) | 830 (85.5) |
| Optimistic regarding the economic impact of MV                | 606 (62.4) | 365 (37.6) |
| Optimistic regarding the impact of MV on vaccination services | 89 (9.2)   | 882 (90.8) |

MV, mandatory vaccination

Table S2 Answers to the conditional questions of the survey.

| Question                                                                                       | N   | %    |
|------------------------------------------------------------------------------------------------|-----|------|
| Medical specialty if achieved [535 observations]                                               |     |      |
| Public Health                                                                                  | 458 | 85.6 |
| Microbiology/infectious diseases                                                               | 15  | 2.8  |
| Pediatrics                                                                                     | 11  | 2.0  |
| Occupational medicine                                                                          | 18  | 3.4  |
| Other                                                                                          | 33  | 6.2  |
| Professional activity dealing with vaccinations: specific field of activity [567 observations] |     |      |
| Delivery of vaccines                                                                           | 208 | 36.7 |
| Organization of vaccination services                                                           | 147 | 25.9 |
| Research                                                                                       | 101 | 17.8 |
| Education                                                                                      | 85  | 15.0 |
| Other                                                                                          | 26  | 4.6  |
| In favor of MV: reason [966 observations]                                                      |     |      |
| It protects the health of individuals and population                                           | 649 | 67.2 |
| It is a good strategy for achieving the European goals for control VPD                         | 207 | 21.4 |
| It is a good strategy for overcoming vaccine hesitancy                                         | 56  | 5.8  |
| It ensures equity (equal distribution of risks and benefits in the population)                 | 38  | 3.9  |
| Other                                                                                          | 16  | 1.7  |
| Not in favor of MV: reason [60 observations]                                                   |     |      |
| It is a coercive measure that harms people's freedom and rights                                | 1   | 1.7  |
| It is a simplistic solution that does not take into account the problem complexity             | 23  | 38.3 |
| It strengthens anti-vaccine movements                                                          | 2   | 3.3  |
| It is a paternalistic approach that disempowers people about their health                      | 32  | 53.4 |
| Other                                                                                          | 2   | 3.3  |
| In favor of flexible MV: reason [107 observations]                                             |     |      |
| It is the right balance between the protection of personal freedom and public health           | 84  | 78.5 |
| It limits the number of mandatory vaccines to those that are strictly necessary                | 11  | 10.3 |
| It is a good strategy for improving relationships with anti-vaccine movements                  | 7   | 6.5  |
| Other                                                                                          | 5   | 4.7  |
| Not in favor of flexible MV: reason [818 observations]                                         |     |      |
| Vaccinations are preventive measures not effective as reactive measures                        | 547 | 66.9 |
| It would be very difficult to ensure adherence to MV in emergency situations                   | 83  | 10.1 |
| There is no information system for the monitoring of vaccination coverage                      | 114 | 13.9 |
| At present, application of the "flexible" option would still be necessary                      | 40  | 4.9  |
| Other                                                                                          | 34  | 4.2  |
| Would extend MPR MV to other groups                                                            |     |      |

Only one answer allowed for each question. VPD, vaccine-preventable diseases; MV, mandatory vaccinations

Table S3 Professional and personal experience with vaccination (total 1044):

a. Professional experience;

| Experience                                                     | Measure  |      |
|----------------------------------------------------------------|----------|------|
| Professional activity dealing with vaccinations, n, % of total |          |      |
| No                                                             | 477      | 45.7 |
| Yes                                                            | 567      | 54.3 |
| Years of experience with vaccinations, average, range          | 7.1(±11) | 0-50 |
| Self-rated knowledge about vaccinations, n, % of total         |          |      |
| Bad                                                            | 2        | 0.2  |
| Poor                                                           | 30       | 2.9  |
| Fair                                                           | 194      | 18.6 |
| Good                                                           | 545      | 52.2 |
| Excellent                                                      | 273      | 26.1 |

b. Personal experience

| Vaccinated or immunized against * | N (%)      |            |            |
|-----------------------------------|------------|------------|------------|
|                                   | <i>Yes</i> | <i>No</i>  | <i>DNR</i> |
| Hepatitis B                       | 895 (85.7) | 130 (12.5) | 19 (1.8)   |
| Influenza (year 2018-19)          | 745 (71.4) | 298 (28.5) | 1 (0.1)    |
| Measles                           | 740 (70.9) | 257 (24.6) | 47 (4.5)   |
| Mumps                             | 697 (66.8) | 291 (27.9) | 56 (5.3)   |
| Rubella                           | 715 (68.5) | 268 (25.7) | 61 (5.8)   |
| Varicella                         | 637 (61.0) | 374 (35.8) | 33 (3.2)   |
| Pertussis                         | 668 (64.0) | 304 (29.1) | 72 (6.9)   |
| All of the above                  | 344 (33.0) | 700 (67.0) | -          |

\* As recommended for healthcare professionals by the National Vaccine Prevention Plan 2017-2019.  
DNR, do not remember.
